# Supplementary material
Source: HighWire-hosted journal article supplement (https://www.cmajopen.ca/highwire/filestream/84925/field_highwire_adjunct_files/2/2020-0323-11-at.pdf)

**Appendix 11. Distribution of length of stay for patients requiring ventilation for all individuals between March 1 and September 30, 2020**

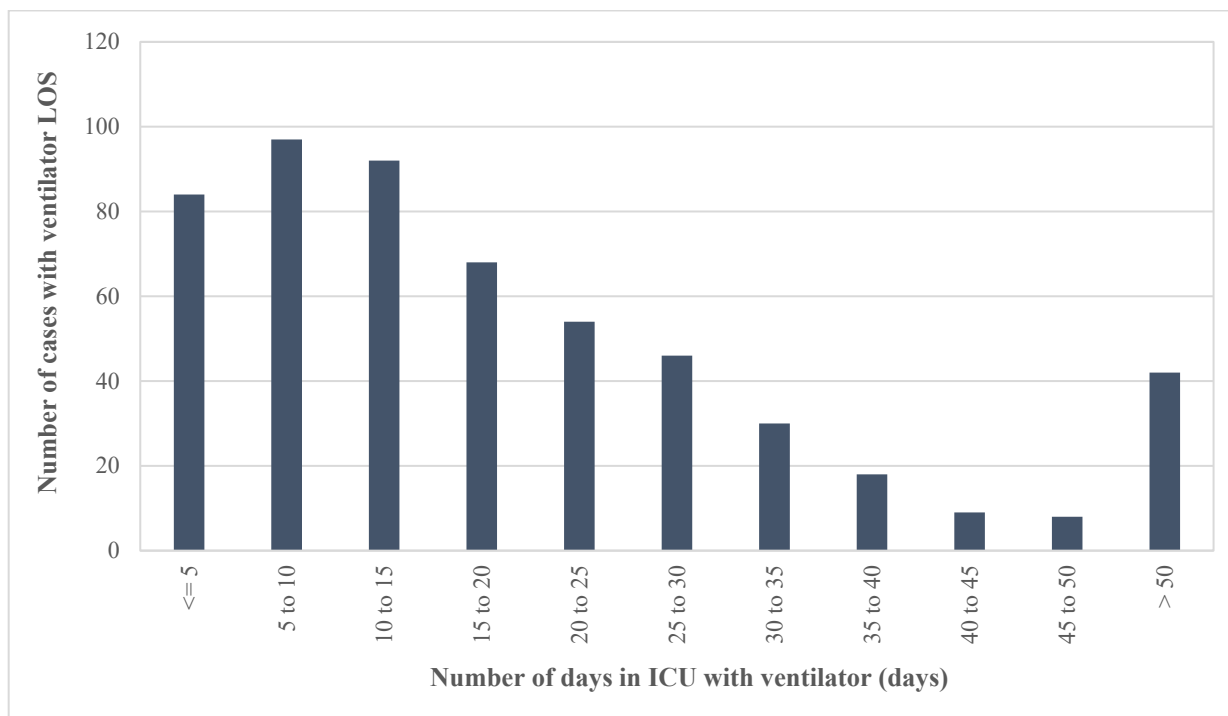

Supplement: 2020-0323-11-at.pdf [file 2020-0323-11-at.pdf]
